# Supplementary material for: A human monoclonal antibody blocking SARS-CoV-2 infection
Source: Nat Commun. 2020 May 4;11:2251. doi: 10.1038/s41467-020-16256-y (PMC7198537; doi:10.1038/s41467-020-16256-y)
Supplement: Supplementary file 1 — Supplementary Information [file 41467_2020_16256_MOESM1_ESM.pdf]

## **Supplemental information**

# **A human monoclonal antibody blocking SARS-CoV-2 infection**

**Wang et al.**

| Hybridoma | SARS-S <sub>ecto</sub> | SARS-S1 | SARS-S1 <sub>A</sub> | SARS2-S1 |
|-----------|------------------------|---------|----------------------|----------|
| 44B3      | 2.5                    | 2.7     | 3.3                  | 0.1      |
| 45E10     | 3.0                    | 0.8     | 1.7                  | 0.0      |
| 46F11     | 2.4                    | 2.7     | 3.3                  | 0.0      |
| 39F9      | 2.9                    | 3.3     | 3.5                  | 0.0      |
| 41A7      | 2.6                    | 1.0     | 1.9                  | 0.0      |
| 28 E3     | 2.4                    | 2.3     | 3.2                  | 0.0      |
| 34C10     | 1.3                    | 1.0     | 1.9                  | 0.0      |
| 16C10     | 2.4                    | 0.6     | 1.7                  | 0.1      |
| 14B1      | 2.6                    | 2.9     | 3.3                  | 0.1      |
| 30B1      | 0.6                    | 0.5     | 1.1                  | 0.0      |
| 28G10     | 1.0                    | 1.3     | 2.6                  | 0.0      |
| 28F6      | 2.4                    | 2.9     | 3.0                  | 0.0      |
| 40H10     | 1.2                    | 0.7     | 1.9                  | 0.0      |
| 39A4      | 1.7                    | 1.5     | 2.8                  | 0.0      |
| 37G1      | 1.3                    | 0.9     | 1.7                  | 0.0      |
| 44E11     | 2.8                    | 3.3     | 3.5                  | 0.1      |
| 19C1      | 1.9                    | 0.4     | 1.2                  | 0.1      |
| 58D2      | 2.6                    | 2.8     | 3.4                  | 0.1      |
| 14C1      | 2.8                    | 1.2     | 2.6                  | 0.0      |
| 45H1      | 2.3                    | 3.1     | 3.6                  | 0.0      |
| 24F5      | 3.3                    | 3.4     | 3.6                  | 0.0      |
| 52D9      | 1.5                    | 1.6     | 2.3                  | 1.3      |
| 45E6      | 2.4                    | 2.6     | 3.3                  | 0.0      |
| 47D11     | 3.4                    | 3.0     | 0.0                  | 1.5      |
| 47G10     | 2.6                    | 2.8     | 0.1                  | 0.0      |
| 48G1      | 3.3                    | 3.4     | 0.1                  | 0.0      |
| 49F1      | 1.8                    | 2.0     | 0.0                  | 1.3      |
| 43C6      | 3.1                    | 3.4     | 0.1                  | 0.1      |
| 22E10     | 3.2                    | 3.4     | 0.1                  | 0.0      |
| 28D11     | 2.7                    | 3.1     | 0.1                  | 0.0      |
| 28H3      | 2.8                    | 1.8     | 0.0                  | 0.0      |
| 25E7      | 3.1                    | 3.3     | 0.1                  | 0.1      |
| 22E8      | 1.2                    | 1.2     | 0.1                  | 0.0      |
| 35F4      | 3.2                    | 3.6     | 0.1                  | 0.0      |
| 43G5      | 3.2                    | 3.3     | 0.1                  | 0.1      |
| 47F8      | 1.4                    | 1.4     | 0.0                  | 0.0      |
| 43B4      | 3.2                    | 3.3     | 0.1                  | 0.0      |
| 49B10     | 1.1                    | 0.6     | 0.0                  | 0.2      |
| 51C11     | 1.9                    | 1.9     | 0.0                  | 0.0      |
| 36F6      | 1.7                    | 2.7     | 0.1                  | 0.3      |
| 65H8      | 3.2                    | 3.3     | 0.1                  | 0.1      |
| 65H9      | 1.6                    | 1.7     | 0.1                  | 2.5      |
| 48D5      | 3.3                    | 3.5     | 0.1                  | 0.0      |
| 35E2      | 2.5                    | 3.3     | 0.2                  | 0.0      |
| 44G3      | 2.4                    | 2.8     | 0.1                  | 0.0      |
| 9H9       | 1.8                    | 0.1     | 0.0                  | 0.1      |
| 25C3      | 3.0                    | 0.1     | 0.1                  | 0.1      |
| 29E6      | 1.1                    | 0.1     | 0.1                  | 0.0      |
| 43F11     | 2.8                    | 0.1     | 0.1                  | 0.0      |
| 47C4      | 1.5                    | 0.0     | 0.1                  | 0.0      |
| 13F11     | 3.0                    | 0.0     | 0.0                  | 0.0      |

| ELISA reactivity hybr. sups                      | # hybr sups |
|--------------------------------------------------|-------------|
| anti-SARS-S1 <sub>A</sub>                        | 23          |
| anti-SARS-S1 (but not binding S1 <sub>A</sub> )  | 22          |
| anti-SARS-S <sub>ecto</sub> (but not binding S1) | 6           |
| Total                                            | 51          |

**Supplementary Table 1. ELISA cross-reactivity of antibody-containing supernatants of SARS-S H2L2 hybridomas towards SARS2-S1.** SARS-S targeting hybridomas were developed by conventional hybridoma technology from immunized H2L2 transgenic mice (Harbour Biomed)<sup>1</sup>. These mice - carrying genes encoding the heavy and light chain human immunoglobulin repertoire - were sequentially immunized with 2-week intervals with trimeric spike protein ectodomains (S<sub>ecto</sub>) of three human coronaviruses from the betacoronavirus genus in the following order: 1. HCoV-OC43-S<sub>ecto</sub>, 2. SARS-CoV-S<sub>ecto</sub>, 3. MERS-CoV-S<sub>ecto</sub>, 4. HCoV-OC43-S<sub>ecto</sub>, 5. SARS-CoV-S<sub>ecto</sub>, 6. MERS-CoV-S<sub>ecto</sub>. Four days after the last immunization, splenocytes and lymph node lymphocytes were harvested and hybridomas were generated. Antibodies in the cell supernatants were tested for ELISA-reactivity against SARS-S<sub>ecto</sub>, SARS-S1, SARS-S1<sub>A</sub> and SARS2-S1. Of the 51 hybridoma supernatants that reacted with SARS-S<sub>ecto</sub> only, 23 reacted with SARS-S1<sub>A</sub>, 22 with SARS-S1 but not SARS-S1<sub>A</sub>, 6 with SARS-S<sub>ecto</sub> but not SARS-S1. Four of the 51 SARS-S<sub>ecto</sub> hybridoma supernatants reacted with SARS2-S1 (see column on the right). The table displays ELISA-signal intensities (OD<sub>450nm</sub> values) of hybridoma supernatants for the different antigens.

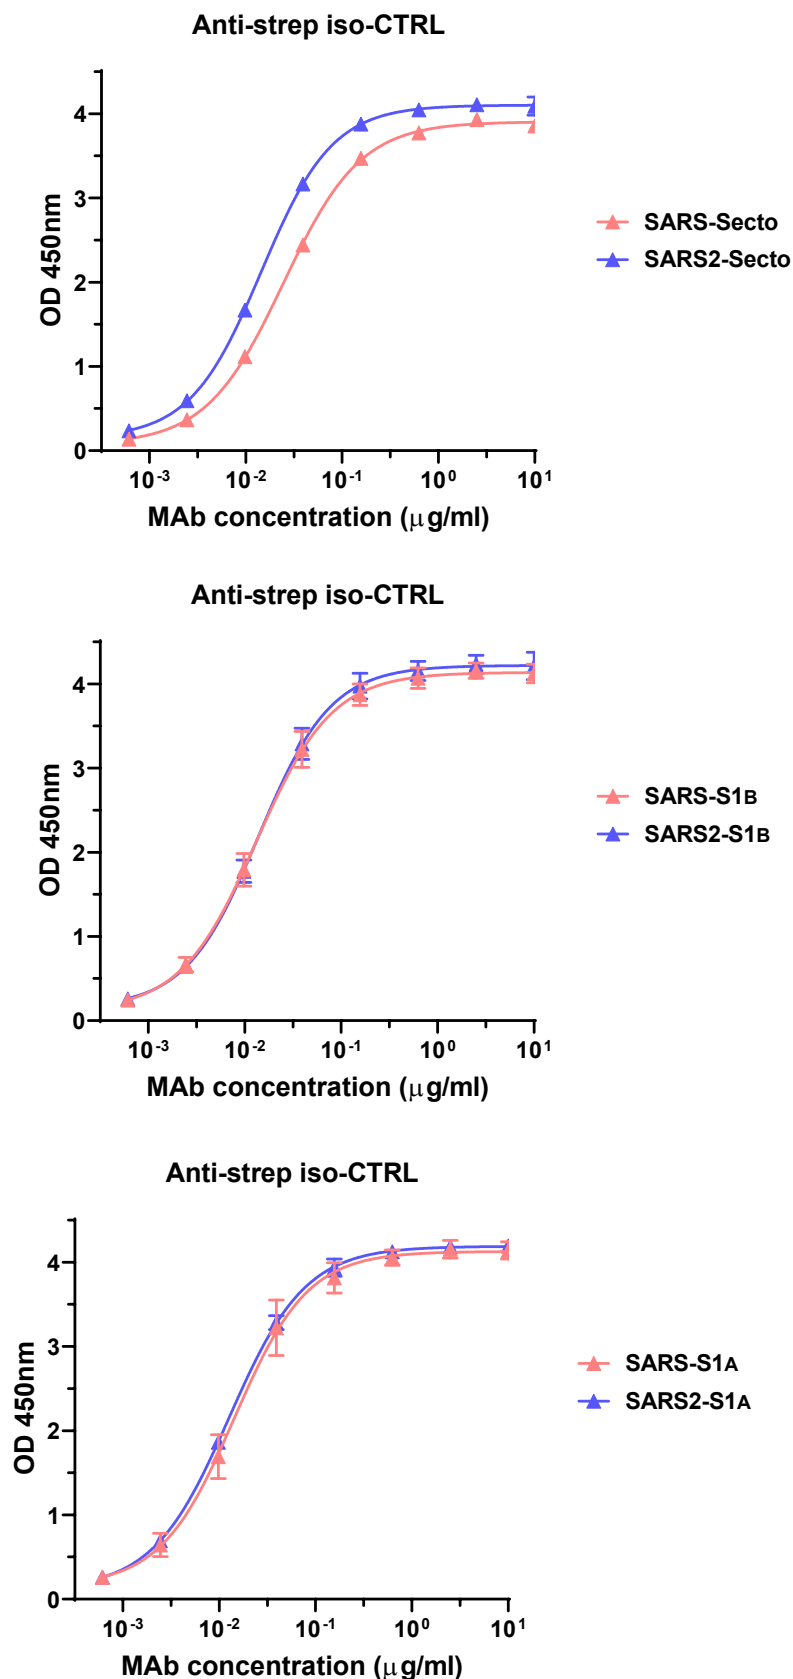

**Supplementary Figure 1.** ELISA binding curve of the anti-StrepMAb (IBA) antibody to Strep-tagged spike antigens to corroborate equimolar ELISA plate coating of SARS-S<sub>ecto</sub> / SARS2-S<sub>ecto</sub> (upper panel), SARS-S1<sub>B</sub> / SARS2-S1<sub>B</sub> (middle panel) and SARS-S1<sub>A</sub> / SARS2-S1<sub>A</sub> (lower panel) antigens used in Fig.2a. The average  $\pm$  SD from two independent experiments with technical duplicates is shown. Source data are provided as a Source Data file.

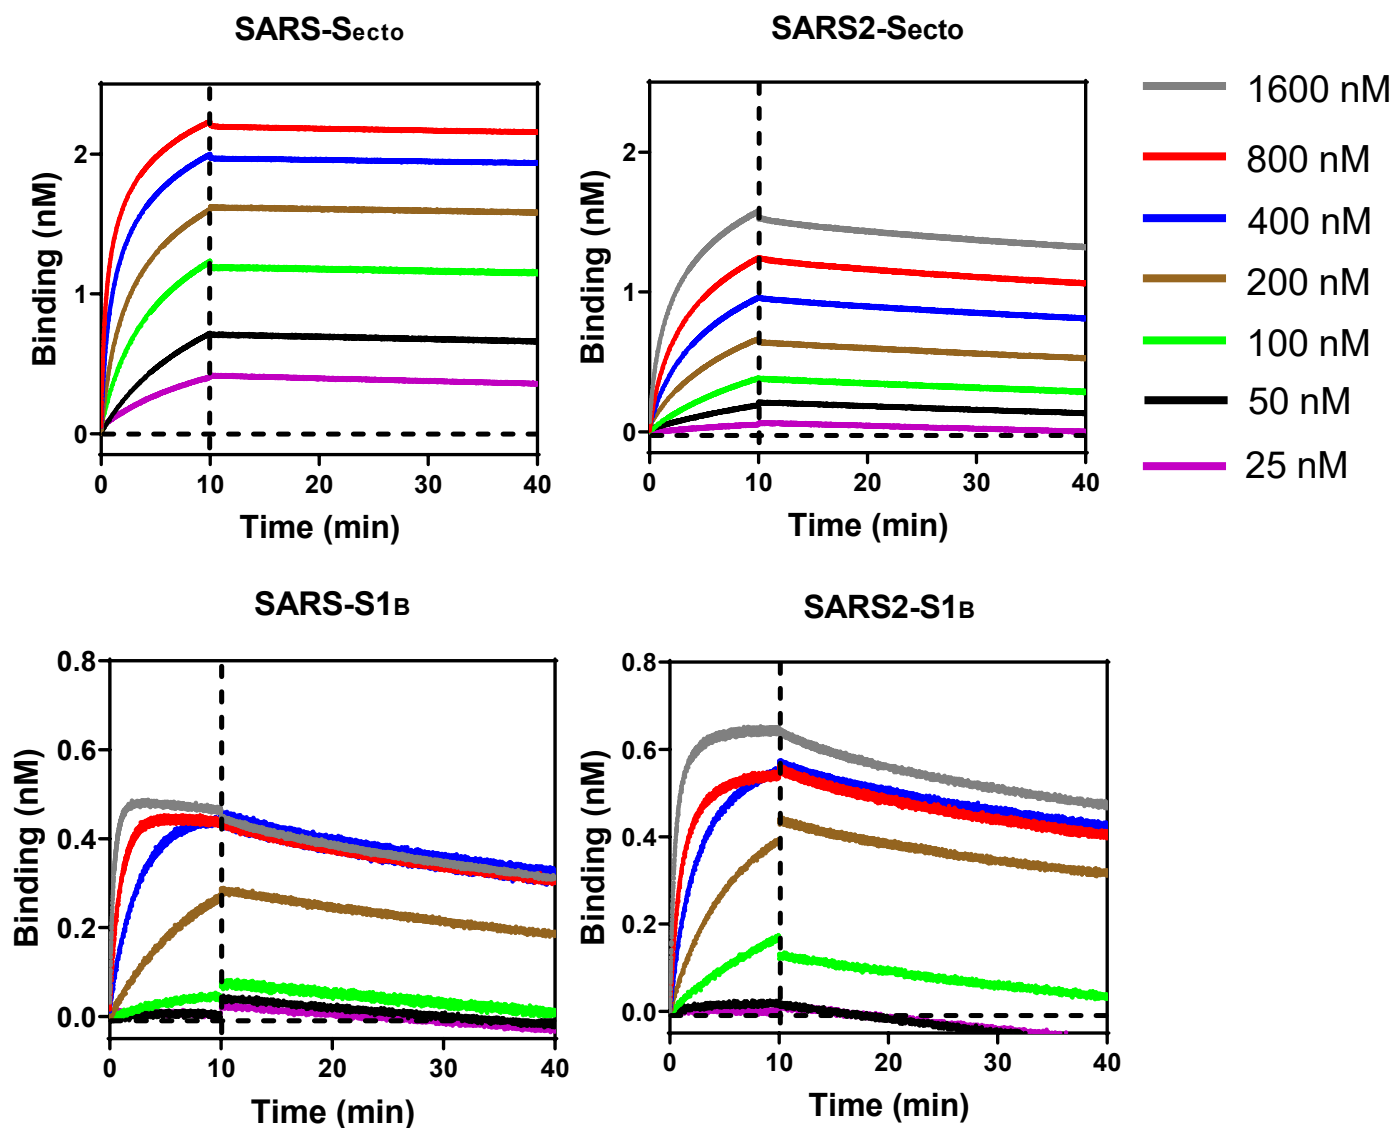

| Spike protein           | $K_D$ (nM)           | $K_{on}$ ( $M^{-1}sec^{-1}$ )  | $K_{off}$ ( $sec^{-1}$ )           |
|-------------------------|----------------------|--------------------------------|------------------------------------|
| SARS-S <sub>ecto</sub>  | 0.745 ( $\pm$ 0.532) | $3.75 (\pm 1.27) \times 10^4$  | $3.42 (\pm 3.34) \times 10^{-5}$   |
| SARS2-S <sub>ecto</sub> | 10.8 ( $\pm$ 2.46)   | $9.77 (\pm 4.09) \times 10^3$  | $9.85 (\pm 3.61) \times 10^{-5}$   |
| SARS-S1 <sub>B</sub>    | 16.1 ( $\pm$ 13.3)   | $2.00 (\pm 0.961) \times 10^4$ | $2.10 (\pm 0.239) \times 10^{-4}$  |
| SARS2-S1 <sub>B</sub>   | 9.56 ( $\pm$ 2.68)   | $1.51 (\pm 0.285) \times 10^4$ | $1.37 (\pm 0.0728) \times 10^{-4}$ |

**Supplementary Figure 2. Binding kinetics of 47D11 to the S ectodomain and S1<sub>B</sub> of SARS-CoV and SARS-CoV-2.** Binding kinetics of 47D11 to immobilized recombinant SARS-S<sub>ecto</sub>, SARS2-S<sub>ecto</sub>, SARS-S1<sub>B</sub> and SARS2-S1<sub>B</sub> was measured using biolayer interferometry at 25°C<sup>2</sup>. Kinetic binding assay was performed by loading 47D11 mAb at optimal concentration (42 nM) on anti-human Fc biosensor for 10 mins. Antigen association step was performed by incubating the sensor with a range of concentrations of the recombinant spike ectodomain (1600-800-400-200-100-50-25 nM) for 10 min, followed by a dissociation step in PBS for 60 min. The kinetics constants were calculated using 1:1 Langmuir binding model on Fortebio Data Analysis 7.0 software. The experiment was performed twice, data from a representative experiment are shown. Source data are provided as a Source Data file.

A

**SARS-S1<sub>B</sub> – ACE2 receptor binding**

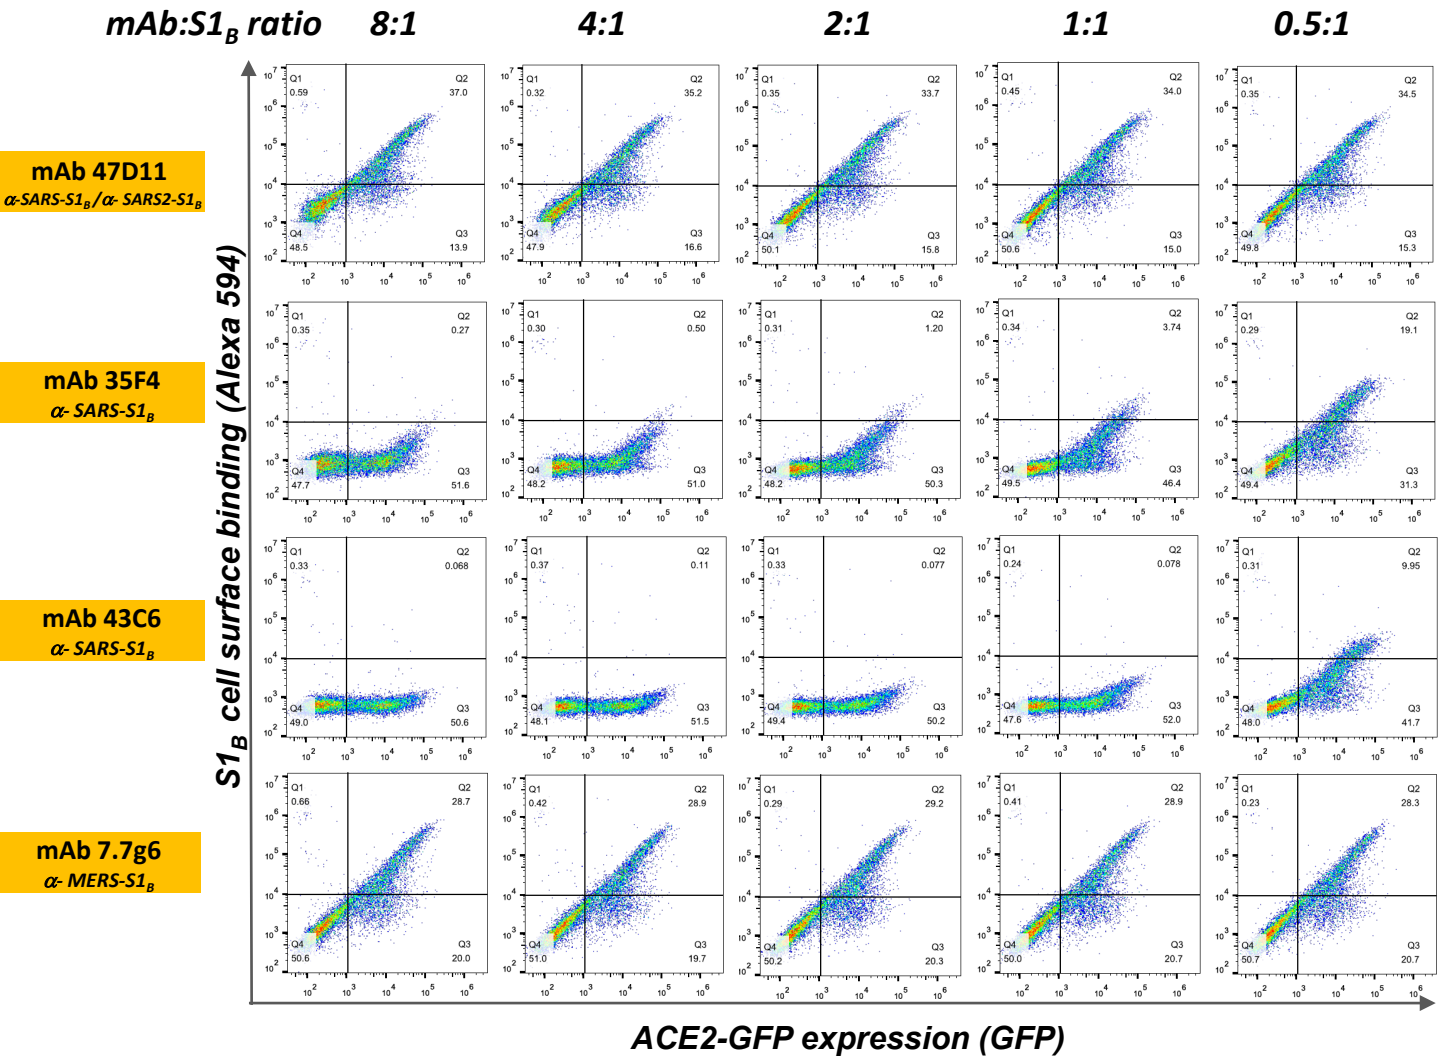

**Binding controls**

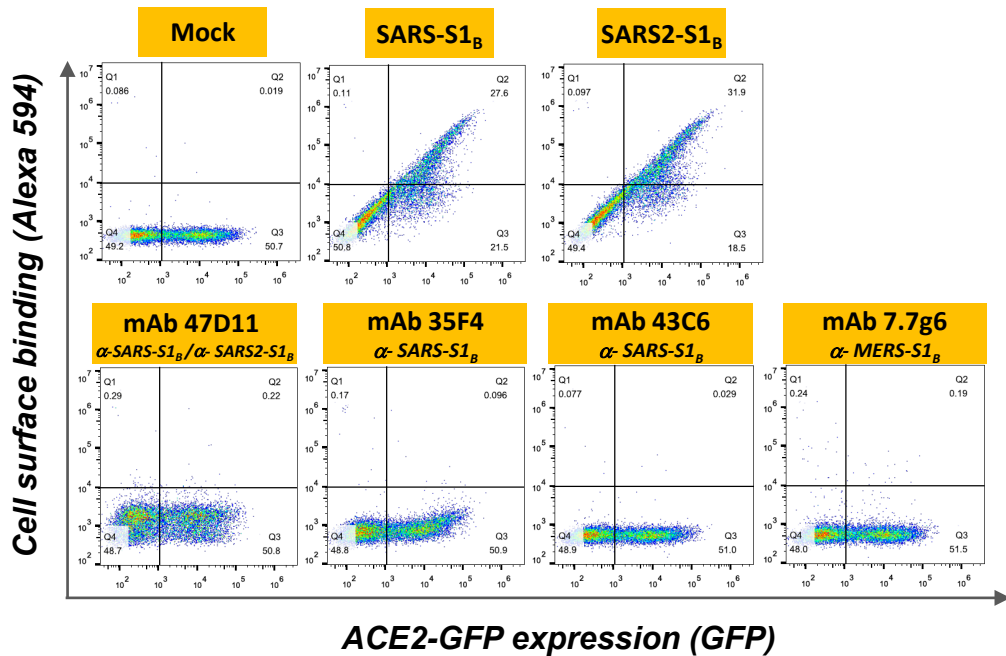

**SARS2-S1<sub>B</sub> – ACE2 receptor binding**

**mAb:S1<sub>B</sub> ratio      8:1                      4:1                      2:1                      1:1                      0.5:1**

**mAb 47D11**  
*α-SARS-S1<sub>B</sub>/α-SARS2-S1<sub>B</sub>*

**mAb 35F4**  
*α-SARS-S1<sub>B</sub>*

**mAb 43C6**  
*α-SARS-S1<sub>B</sub>*

**mAb 7.7g6**  
*α-MERS-S1<sub>B</sub>*

**S1<sub>B</sub> cell surface binding (Alexa 594)**

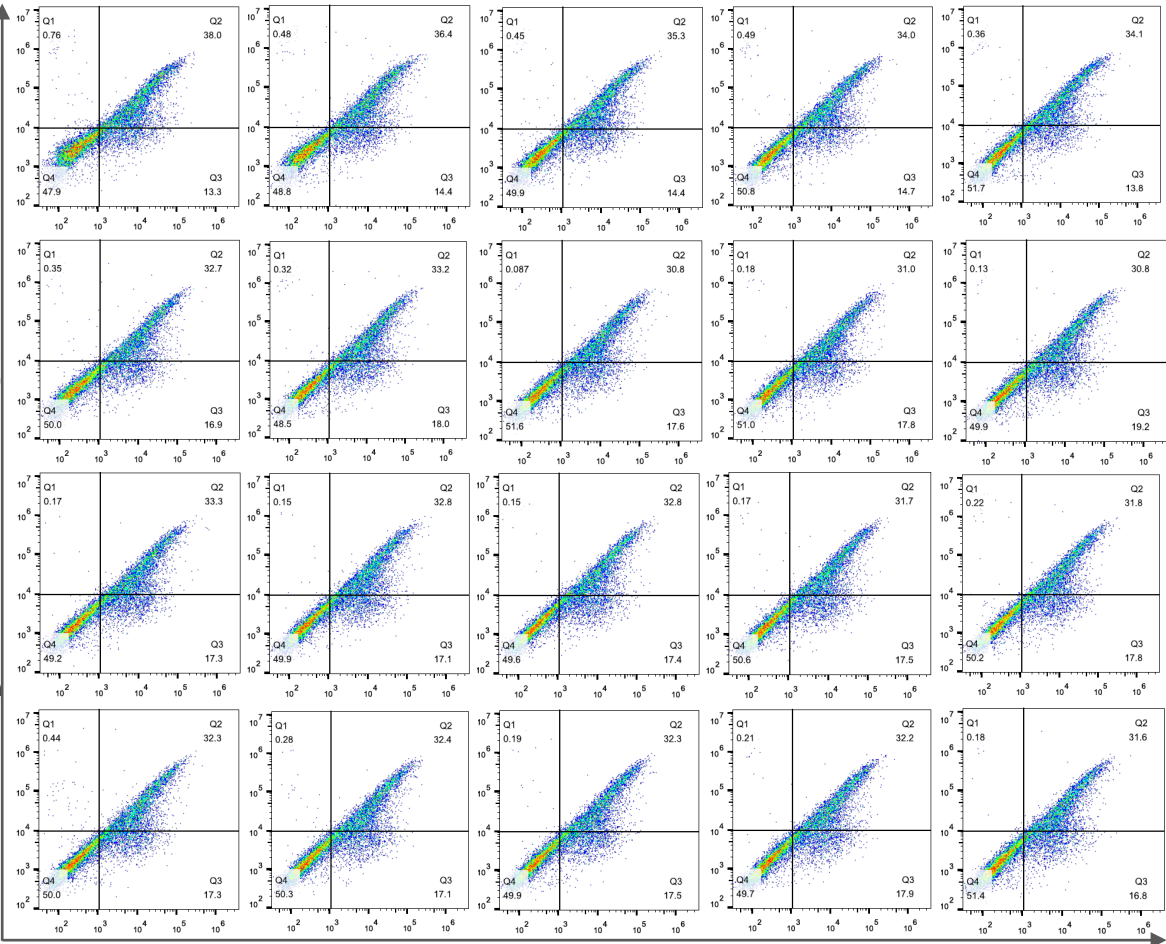

**ACE2-GFP expression (GFP)**

**B**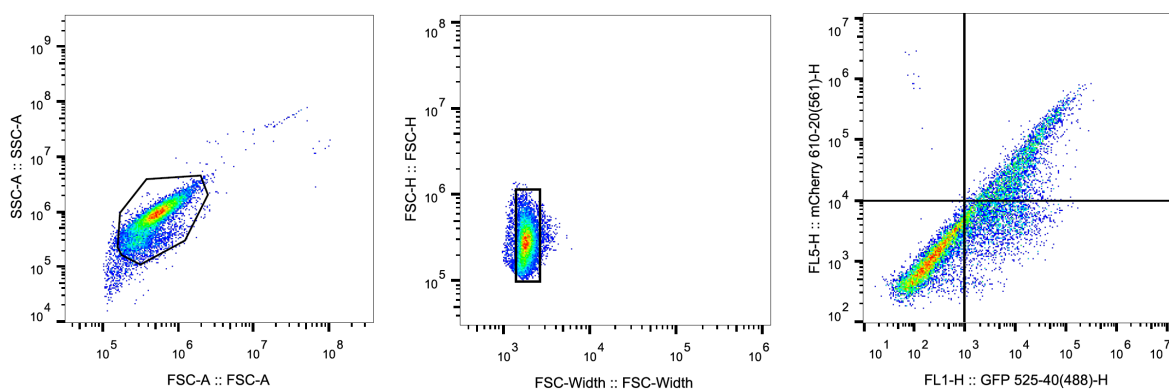

**Supplementary Figure 3. 47D11 does not prevent binding of SARS-S1<sub>B</sub> and SARS2-S1<sub>B</sub> to ACE2-expressing cells.** A) Human HEK-293T cells expressing human ACE2-GFP proteins (see Methods) were detached and fixed with 2% PFA, incubated with a fixed amount of human Fc-tagged S1<sub>B</sub> domain of SARS-S or SARS2-S that was preincubated for 1h with mAb (mAbs 47D11, 35F4, 43C6, 7.7G6, in H2L2 format) at the indicated mAb:S1<sub>B</sub> molar ratios, and analysed by flow cytometry using a Alexa Fluor 594-conjugated secondary antibody targeting the human Fc tag. Cells are analysed for GFP expression (x-axis, GFP signal) and antibody binding (y-axis, Alexa 594 signal). Percentages of cells that scored negative, single positive, or double positive are shown in each quadrant. Binding controls include PBS-treated cells (mock), treatment of cells with SARS-S1<sub>B</sub> and SARS2-S1<sub>B</sub> in the absence of antibody, and cells treated with antibodies only. The experiment was performed twice, data from a representative experiment are shown. B) Graphical account for FACS sequential gating strategies. FACS gating was performed as previously described<sup>2</sup>. Cells were selected in FSC/SSC dot plot to remove debris, single cells were gated using the FSC-H/FSC-W dot plot. GFP+, Alexa 594+ cells were gated and compared with a control sample with no detectable fluorochrome expression.

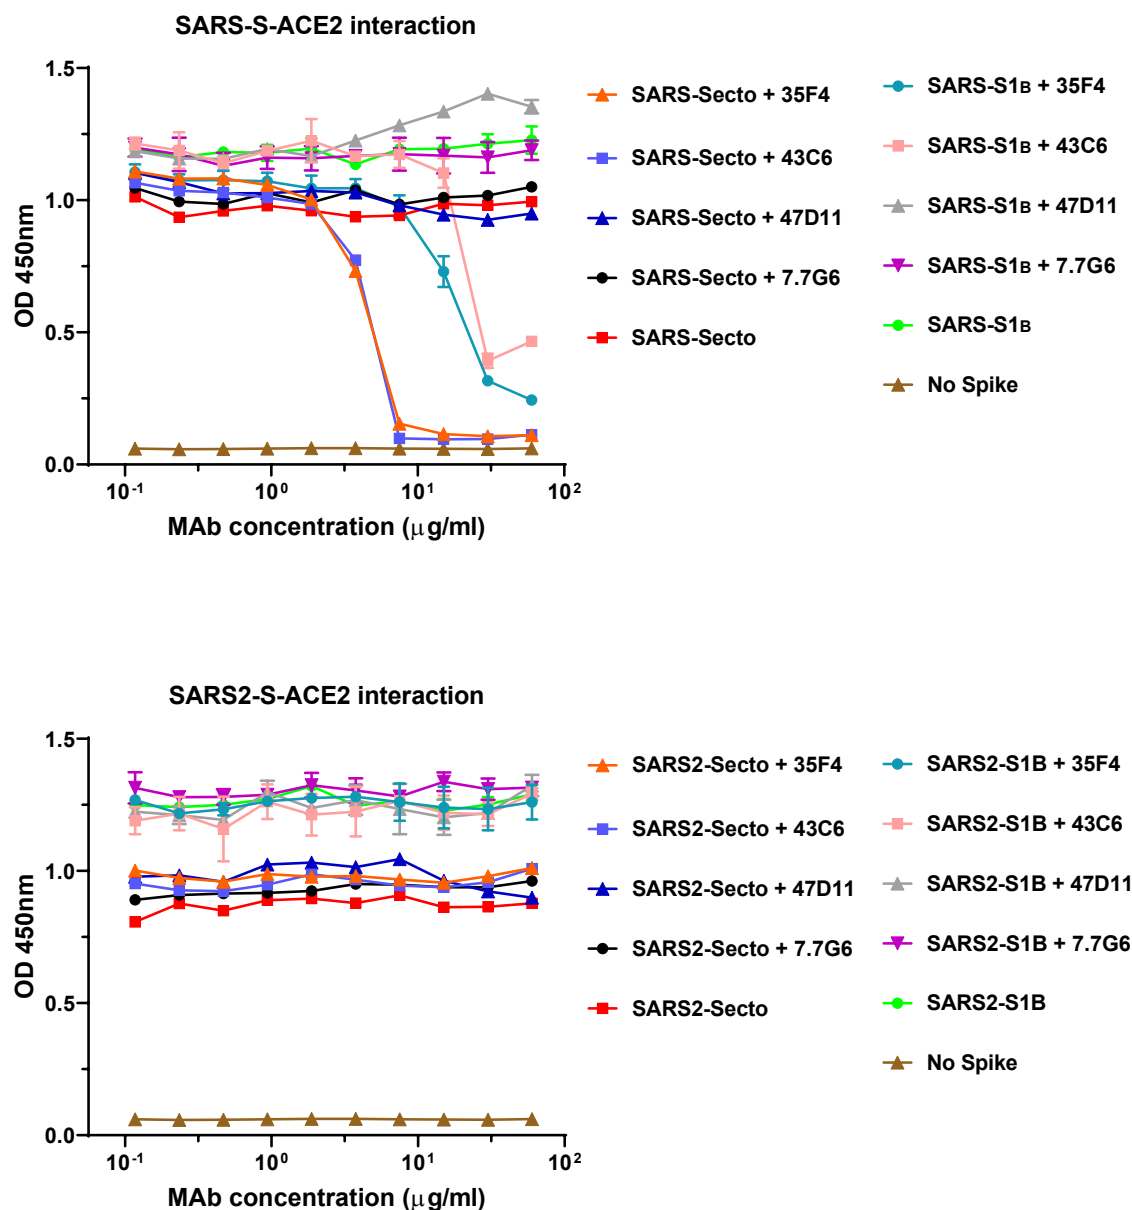

**Supplementary Figure 4. ELISA-based receptor binding inhibition assay.** The ELISA-based receptor binding inhibition assay was performed as described previously with some adaptations<sup>1</sup>. Recombinant soluble human ACE2 was coated on NUNC Maxisorp plates (Thermo Scientific) at 4°C overnight. Plates were washed three times with PBS containing 0.05% Tween-20 and blocked with 5% protifar in PBS containing 0.1% Tween-20 at room temperature for 3 hours. Recombinant S<sub>ecto</sub> and S1<sub>B</sub> of SARS-S or SARS2-S (300 ng) and serially diluted mAbs (mAbs 47D11, 35F4, 43C6, 7.7G6, in H2L2 format) were mixed for 1h at RT, added to the plate for 2 hour on ice, after which the plates were washed three times. Binding to ACE2 was detected using HRP-conjugated StrepMAb (IBA) that recognizes the C-terminal Streptag on the S<sub>ecto</sub> and S1<sub>B</sub> proteins. The experiment was performed twice. The average  $\pm$  SD from a representative experiment with technical duplicates is shown. Source data are provided as a Source Data file.

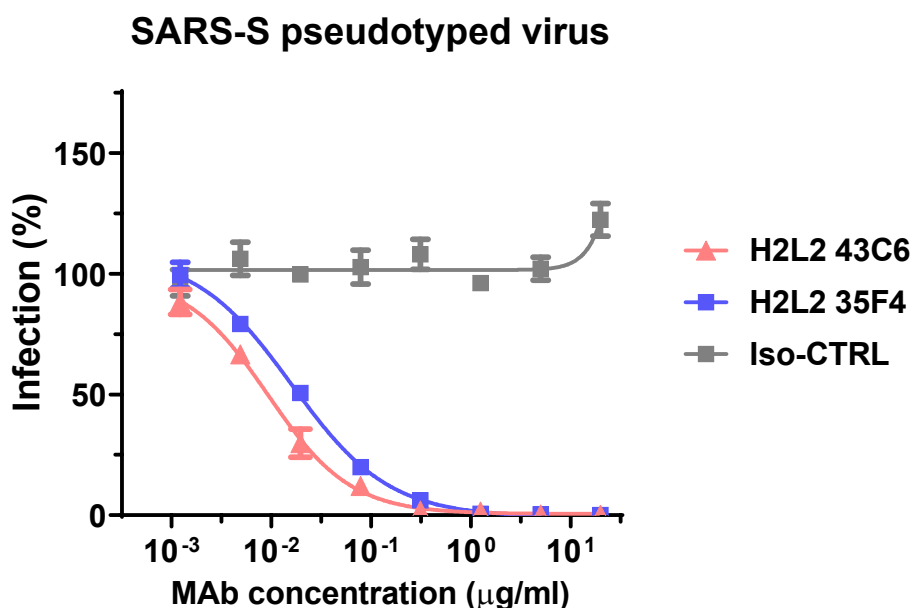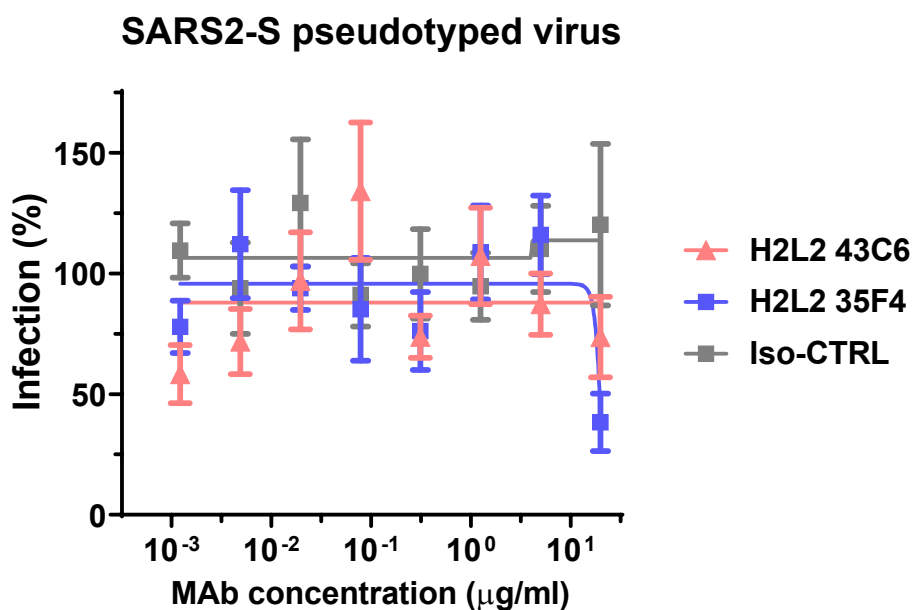

**Supplementary Figure 5.** H2L2 monoclonal antibodies 35F4 and 43C6 neutralize SARS-CoV but not SARS-CoV-2. Antibody-mediated neutralization of infection of VSV particles pseudotyped with spike proteins of SARS-CoV (upper panel) and SARS-CoV-2 (lower panel) by the 35F4 and 43C6 H2L2 antibodies targeting SARS-S1 but not SARS2-S1 (see Suppl.Fig.1). An irrelevant antibody was taken along as a human IgG1 isotype control. The average  $\pm$  SD from two independent experiments with technical triplicates is shown. Source data are provided as a Source Data file.

|            | trypsin | +     | +    | +     | + | - |
|------------|---------|-------|------|-------|---|---|
|            | mAb     | 47D11 | 35F4 | 7.7G6 | - | - |
| SARS-CoV   | S-GFP   |       |      |       |   |   |
|            | Overlay |       |      |       |   |   |
| SARS-CoV-2 | S-GFP   |       |      |       |   |   |
|            | Overlay |       |      |       |   |   |
| MERS-CoV   | S-GFP   |       |      |       |   |   |
|            | Overlay |       |      |       |   |   |

**Supplementary Figure 6. Cell-cell fusion inhibition assay.** The cell-cell-fusion inhibition assay was performed as described previously with some adaptations<sup>1</sup>. VeroE6 cells were seeded with density of  $10^5$  cells per ml. After reaching 70~80% confluency, cells were transfected with plasmids encoding full length SARS-S, SARS2-S and MERS-S – C-terminally fused to GFP - using Lipofectamine 2000 (Invitrogen). The furin recognition sites in the SARS2-S (R<sup>682</sup>RAR to A<sup>682</sup>AAR) and MERS-S (R<sup>747</sup>SVR to Y<sup>747</sup>SVR) were mutated to inhibit cleavage of the protein by endogenous furin and allow trypsin-induced syncytia formation. Two days post transfection, cells were pretreated DMEM only or DMEM with 20 µg/ml mAbs for 1 h and subsequently treated with DMEM with 15 µg/ml trypsin (to activate the spike fusion function) in the absence or presence of 20 µg/ml mAbs (47D11 cross-reactive to SARS-S and SARS2-S, 35F4 reactive to SARS-S, 7.7G6 reactive to MERS-S). After incubation at 37°C for 2 hrs, the cells were fixed with 2% PFA in PBS for 20 min at room temperature and stained for nuclei with 4,6-diamidino-2-phenylindole (DAPI). Cells expressing the S-GFP proteins were detected by fluorescence microscopy and S-mediated cell-cell fusion was observed by the formation of (fluorescent) multi-nucleated syncytia. The fluorescence images were recorded using a Leica Spell confocal microscope. The experiment was performed twice, data from a representative experiment are shown.

```
SARS-RBD      323  CPFGEVFNATKFPSVYAWERKKISNCVADYSVLNSTFFSTFKCYGVSATKLNDLCSNV
SARS2-RBD     438  CPFGEVFNATRFASVYAWNRKRISNCVADYSVLNSASFSTFKCYGVSPTKLNLCFTNV
                *****:* *****:**:*****: ***** *****:**
SARS-RBD      383  YADSFVVKGDDVRQIAPGQTGVIADYNYKLPDDFMGCVLAWNTRNIDATSTGNYNYKYRY
SARS2-RBD     396  YADSFVIRGDEVQRQIAPGQTGKIADYNYKLPDDFTGCVIAWNSNNLDSKVGGNYYLYRL
                *****:**:***** ***** *****:**:***:. ***** **
SARS-RBD      443  LRHGKLRPFERDISNVPFSPDGKPCTP-PALNCYWPLNDYGFYTTTGIGYQPYRVVVLSE
SARS2-RBD     456  FRKSNLKPFERDISTEIYQAGSTPCNGVEGFNCYFPLQSYGFQPTNGVGYQPYRVVVLSE
                *:..*:*****. :. ...**. .:***:**:.*** *.*:*****
SARS-RBD      502  ELLNAPATVCGP
SARS2-RBD     516  ELLHAPATVCGP
                ***:*****
```

**Supplementary Figure 7. Protein sequence alignment of the S1<sub>B</sub> receptor binding domain (RBD) of the SARS-CoV and SARS-CoV-2 spike proteins by ClustalW.** Numbering denotes the residue position in the full-length spike protein of SARS-CoV (Genbank: AAP13441.1) and SARS-CoV-2 (Genbank: QHD43416.1). Asterisks (\*) indicated fully conserved residues, the colon symbol (:) indicates conservation between groups of very similar properties, and the period symbol (.) indicates conservation between groups of weakly similar properties. Sequences corresponding to the S1<sub>B</sub> receptor binding core domain and the receptor binding subdomain are colored in blue and orange, respectively. The fourteen residues that are involved in binding of SARS-CoV S1<sub>B</sub> to human ACE2 are highlighted in grey<sup>3</sup>.

## Supplementary References

1. Widjaja, I. et al. Towards a solution to MERS: protective human monoclonal antibodies targeting different domains and functions of the MERS-coronavirus spike glycoprotein. *Emerg. Microbes Infect.* 8, 516-530 (2019).
2. Lenos, K. J. et al. Stem cell functionality is microenvironmentally defined during tumour expansion and therapy response in colon cancer. *Nat. Cell Biol.* 20, 1193-1202 (2018).
3. Li, F. et al. Structure of SARS coronavirus spike receptor-binding domain complexed with receptor. *Science* 309, 1864-1868 (2005).
